# Supplementary material for: Mediterranean seagrasses as carbon sinks: Methodological and regional differences
Source: Copernicus journal article supplement (doi:10.5194/bg-2021-60), 2021-04-08
Supplement: Supplementary file 1 [file bg-2021-60-supplement-version1.pdf]

# Mediterranean seagrasses as carbon sinks: Methodological and regional differences

Anna Escolano-Moltó<sup>1</sup>, Susana Flecha<sup>1</sup>, Raquel Vaquer-Sunyer<sup>2</sup>, Marlene Wesselmann<sup>1</sup>, Núria Marbà<sup>1</sup>, Iris E. Hendriks<sup>1</sup>

<sup>1</sup>Instituto Mediterráneo de Estudios Avanzados (IMEDEA-CSIC-UIB), C/Miquel Marqués 21, 07109 Esporles, Illes Balears, (Spain).

<sup>2</sup>Marilles Foundation, la Rambla 13, 07003, Palma de Mallorca, Illes Balears, (Spain).

Correspondence to Iris E. Hendriks (iris@imedea.uib-csic.es)

## 6 Appendices

**Table S1.** Coordinates of sampling sites and related Meteorological stations. Data for the stations in Mallorca provided by the Agencia Estatal de Meteorología (AEMET), and from the Cyprus Department of Meteorology for Cyprus sampling sites and from the Hellenic National Meteorological Service for the sampling sites in Crete.

| Sampling station          | Latitude (°) | Longitude (°) | Meteorological station        | Latitude (°) | Longitude (°) |
|---------------------------|--------------|---------------|-------------------------------|--------------|---------------|
| Cap Enderrocat (Mallorca) | 39.473       | 2.721         |                               |              |               |
| Son Veri (Mallorca)       | 39.495       | 2.73          | Palma Son San Juan (Mallorca) | 39.561       | 2.737         |
| Cala Blava (Mallorca)     | 39.489       | 2.724         |                               |              |               |
| Pt. Negra (Mallorca)      | 39.552       | 2.61          |                               |              |               |
| Magalluf (Mallorca)       | 39.537       | 2.674         | Palma CTM (Mallorca)          | 39.553       | 2.625         |
| St. Elm (Mallorca)        | 39.726       | 2.603         |                               |              |               |
| Sta. Maria (Mallorca)     | 39.15        | 2.96          | Pollença (Mallorca)           | 39.909       | 3.1           |
| Pollença (Mallorca)       | 39.826       | 3.088         |                               |              |               |
| Marathi (Crete)           | 35.504       | 24.174        | Chania (Crete)                | 35.553       | 24.068        |
| Kalami (Crete)            | 35.47        | 24.136        |                               |              |               |
| Maridati (Crete)          | 35.222       | 26.273        | Sitia (Crete)                 | 35.205       | 26.095        |
| Limmassol (Cyprus)        | 34.707       | 33.123        | 1389-7615 Tepak (Cyprus)      | 34.677       | 3.038         |

**Table S2.** Summary of the available metabolic data per species, region and season.

|                         | NCP       | CR        | GPP       |
|-------------------------|-----------|-----------|-----------|
| <b>benthic chambers</b> | <b>99</b> | <b>67</b> | <b>67</b> |
| <i>Cymodocea nodosa</i> |           |           |           |
| WEST                    | 19        | 19        | 19        |
| Fall                    | 1         | 1         | 1         |
| Spring                  | 4         | 4         | 4         |
| Summer                  | 14        | 14        | 14        |

*Posidonia oceanica*

|                           |                |            |            |            |
|---------------------------|----------------|------------|------------|------------|
| <i>EAST</i>               |                | 6          | 6          | 6          |
|                           | Fall           | 1          | 1          | 1          |
|                           | Spring         | 1          | 1          | 1          |
|                           | Summer         | 2          | 2          | 2          |
|                           | Winter         | 2          | 2          | 2          |
| <i>WEST</i>               |                | 74         | 42         | 42         |
|                           | Anual          | 1          | 1          | 1          |
|                           | Fall           | 10         | 8          | 8          |
|                           | Spring         | 16         | 9          | 9          |
|                           | Summer         | 39         | 19         | 19         |
|                           | Winter         | 8          | 5          | 5          |
|                           | <b>sensors</b> | <b>69</b>  | <b>66</b>  | <b>74</b>  |
| <i>Cymodocea nodosa</i>   |                | 30         | 30         | 30         |
| <i>EAST</i>               |                | 8          | 8          | 8          |
|                           | Summer         | 8          | 8          | 8          |
| <i>WEST</i>               |                | 22         | 22         | 22         |
|                           | Fall           | 1          | 1          | 1          |
|                           | Spring         | 2          | 2          | 2          |
|                           | Summer         | 18         | 18         | 18         |
|                           | Winter         | 1          | 1          | 1          |
| <i>Posidonia oceanica</i> |                | 39         | 36         | 44         |
| <i>EAST</i>               |                | 6          | 6          | 6          |
|                           | Summer         | 6          | 6          | 6          |
| <i>WEST</i>               |                | 33         | 30         | 38         |
|                           | Anual          |            |            | 9          |
|                           | Fall           | 4          | 4          | 4          |
|                           | Spring         | 11         | 11         | 11         |
|                           | Summer         | 15         | 14         | 13         |
|                           | Winter         | 3          | 1          | 1          |
| <b>Total</b>              |                | <b>168</b> | <b>133</b> | <b>141</b> |

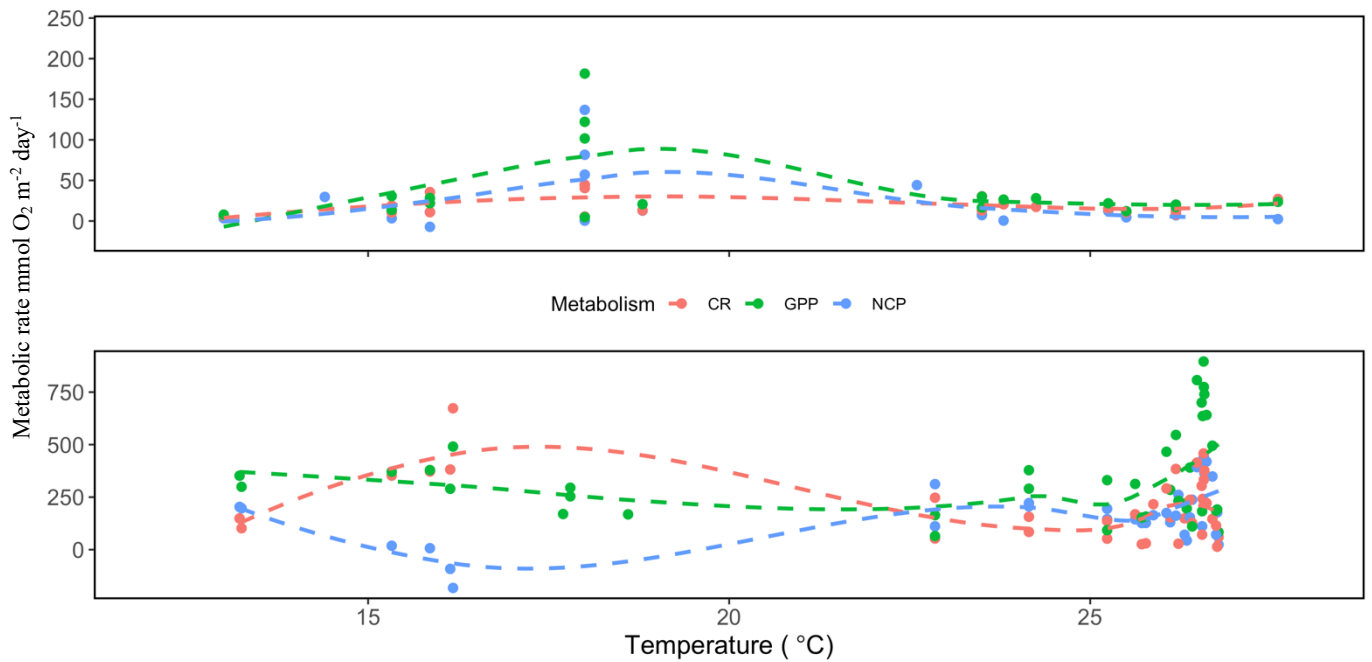

**Figure S1.** Metabolic rates (CR, NCP and GPP in mmol O<sub>2</sub> m<sup>-2</sup> day<sup>-1</sup>) in relationship with the *in situ* temperature in the *Posidonia oceanica* benthic chambers data (top plot) and for all sensor data (bottom plot) in the Western basin. A positive linear correlation was found for NCP with temperature, while negative for CR based on sensor data. No significant regressions were found with temperature for benthic chambers. The dashed line shows the least square fit of the metabolic rates.

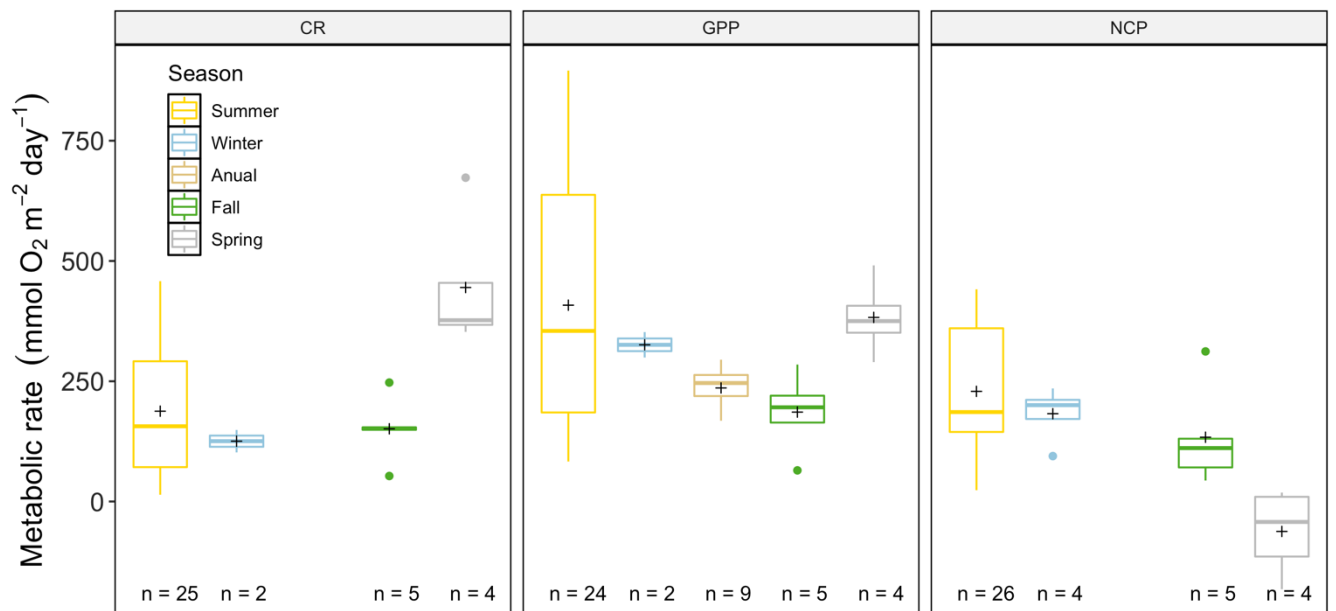

**Figure S2 A.** Seasonal metabolic rates (GPP, NCP and CR in mmol O<sub>2</sub> m<sup>-2</sup> day<sup>-1</sup>) in the Western Mediterranean basin calculated with sensor data. Upper and lower hinges correspond to the upper and lower quartiles. the line inside the boxes correspond to the median, while the mean is shown with cross hairs and the error bars are based on minimum and maximum standard deviation for each parameter.

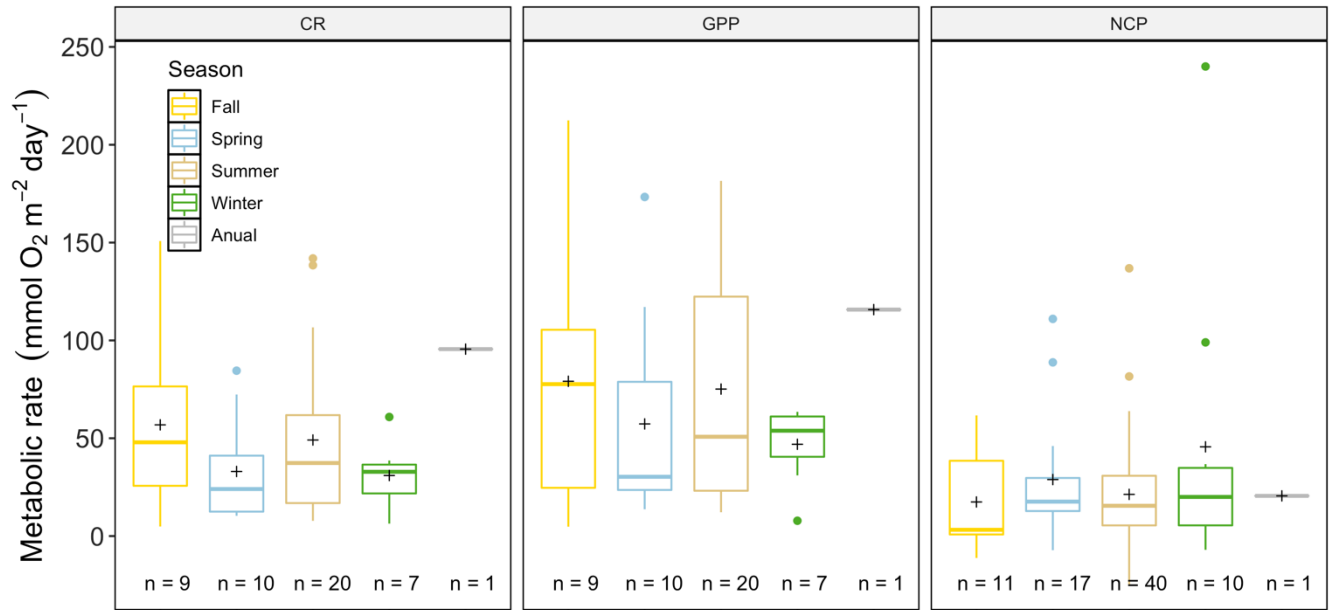

**Figure S2 B.** Seasonal metabolic rates (GPP, NCP and CR in  $\text{mmol O}_2 \text{ m}^{-2} \text{ day}^{-1}$ ) calculated with benthic chamber data for *Posidonia oceanica*. Upper and lower hinges correspond to the upper and lower quartiles, the line inside the boxes correspond to the median, while the mean is shown with cross hairs and the error bars are based on minimum and maximum standard deviation for each parameter.

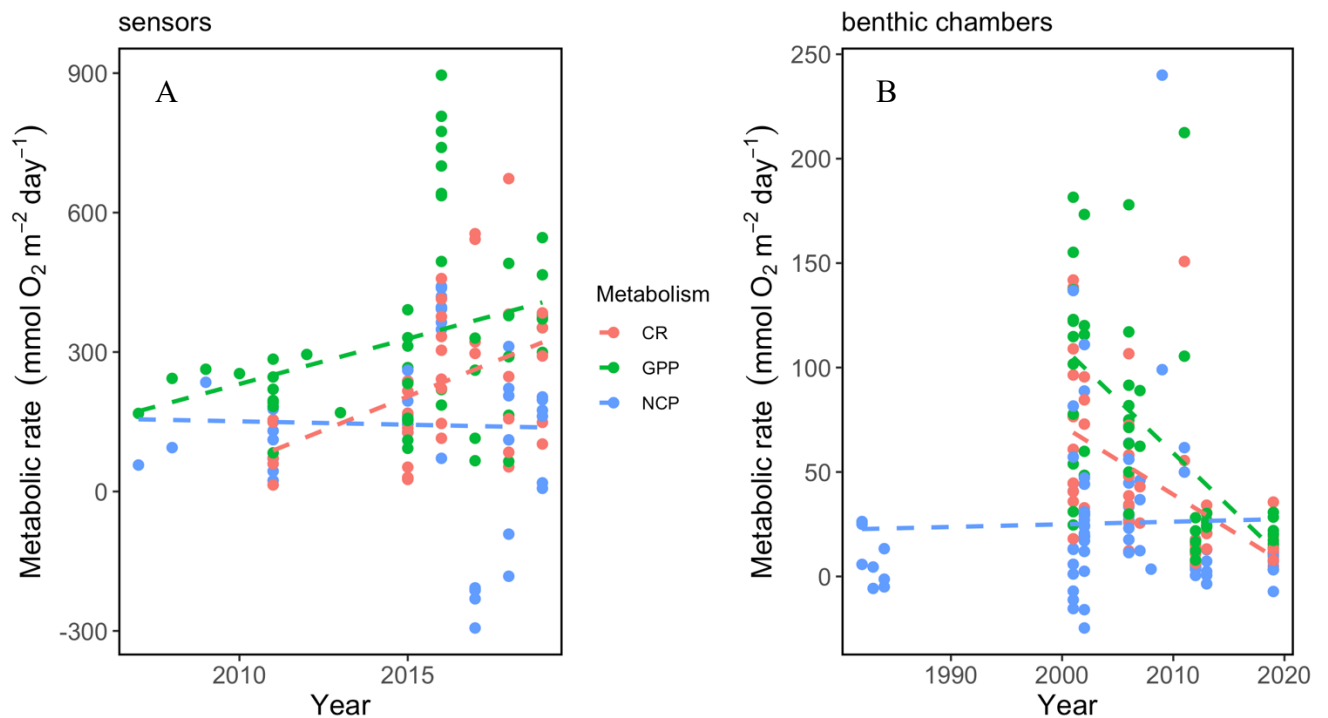

**Figure S3.** Changes over time (Year) in metabolic rates (GPP, NCP and CR in  $\text{mmol O}_2 \text{ m}^{-2} \text{ day}^{-1}$ ) for A) rates calculated with sensor data (both basins) and B) incubations of *Posidonia oceanica*. Dashed lines correspond to linear regressions, with only the positive relationship with CR over time for sensor data significant.
