# Supplementary material for: Mediterranean seagrasses as carbon sinks: Methodological and regional differences
Source: Copernicus journal article supplement (doi:10.5194/bg-2021-60), 2021-04-08
Supplement: Supplementary file [file bg-2021-60-AC2-supplement.pdf]

## Reply to Comment on bg-2021-60

### Referee #2

Comparing the methodology for assessment of GPP using benthic chambers and the potentiometric probes is so apt and need of the hour especially while highlighting the role of marine macrophytes to combat climate change impacts. The aim and objective of the article is genuine and well achieved.

Reply: Thank you very much for your comment. The authors really appreciate it.

Metabolic rates of seagrasses may vary with the temperature, salinity, pH, dissolved oxygen levels etc of ambient water as well as photoperiod and PAR reaching the canopy (depth). If the authors have taken care of these factors prevailed during the long observation period ( 2000 to 2019 while drawing inference, this preprint assumes more merit of publication in the Biogeo Sciences Journal.

Reply: The authors strongly appreciate your comments. The factors mentioned have been taken in account in this study, although not the same amount of associated data was available for all variables.

Except for a few typographical errors (page no 2, line 43 name not in italics, Page 1 line 23 Easter or Eastern basin?) and grammer in a few pages (page 11 line 281 tense), the manuscript has been well constructed with bold presentation of results.

Reply: Thank you for the remarks. In order to improve the quality, corrections have been made in the main text.
